# Supplementary material
Source: publisher figshare collection journal article supplement (https://sage.figshare.com/ndownloader/files/24129756)
Supplement: Supplementary file 1 [file 24129756]

| Supplemental Table 1: 20 Most Common Elective Surgeries Based on CPT Code |       |      |                                                                                                                                                                                                                     |
|---------------------------------------------------------------------------|-------|------|---------------------------------------------------------------------------------------------------------------------------------------------------------------------------------------------------------------------|
| CPT Code                                                                  | #     | %    | Code Description                                                                                                                                                                                                    |
| 27447                                                                     | 3,513 | 19.0 | Arthroplasty, knee, condyle and plateau; medial AND lateral compartments with or without patella resurfacing (total knee arthroplasty)                                                                              |
| 27130                                                                     | 2,025 | 11.0 | Arthroplasty, acetabular and proximal femoral prosthetic replacement (total hip arthroplasty), with or without autograft or allograft                                                                               |
| 63047                                                                     | 866   | 4.7  | Laminectomy, facetectomy and foraminotomy (unilateral or bilateral with decompression of spinal cord, cauda equina and/or nerve root[s], [eg, spinal or lateral recess stenosis]), single vertebral segment; lumbar |
| 35301                                                                     | 740   | 4.0  | Thromboendarterectomy, including patch graft, if performed; carotid, vertebral, subclavian, by neck incision                                                                                                        |
| 44204                                                                     | 496   | 2.7  | Laparoscopy, surgical; colectomy, partial, with anastomosis                                                                                                                                                         |
| 44207                                                                     | 307   | 1.7  | Laparoscopy, surgical; colectomy, partial, with anastomosis, with coloproctostomy (low pelvic anastomosis)                                                                                                          |
| 22612                                                                     | 262   | 1.4  | Arthrodesis, posterior or posterolateral technique, single level; lumbar (with lateral transverse technique, when performed)                                                                                        |
| 44205                                                                     | 239   | 1.3  | Laparoscopy, surgical; colectomy, partial, with removal of terminal ileum with ileocolostomy                                                                                                                        |
| 55866                                                                     | 236   | 1.3  | Laparoscopy, surgical prostatectomy, retropubic radical, including nerve sparing, includes robotic assistance, when performed                                                                                       |
| 48150                                                                     | 229   | 1.2  | Pancreatectomy, proximal subtotal with total duodenectomy, partial gastrectomy, choledochenterostomy and gastrojejunostomy (Whipple-type procedure); with pancreatojejunostomy                                      |
| 47120                                                                     | 217   | 1.2  | Hepatectomy, resection of liver; partial lobectomy                                                                                                                                                                  |
| 58571                                                                     | 204   | 1.1  | Laparoscopy, surgical, with total hysterectomy, for uterus 250 g or less; with removal of tube(s) and/or ovary(s)                                                                                                   |
| 48153                                                                     | 189   | 1.0  | Pancreatectomy, proximal subtotal with near-total duodenectomy, choledochenterostomy and duodenojejunostomy (pylorus-sparing, Whipple-type procedure); with pancreatojejunostomy                                    |
| 27487                                                                     | 191   | 1.0  | Revision of total knee arthroplasty, with or without allograft; femoral and entire tibial component                                                                                                                 |
| 49505                                                                     | 191   | 1.0  | Repair initial inguinal hernia, age 5 years or older; reducible                                                                                                                                                     |
| 44140                                                                     | 183   | 1.0  | Colectomy, partial; with anastomosis                                                                                                                                                                                |
| 22551                                                                     | 167   | 0.9  | Arthrodesis, anterior interbody, including disc space preparation, discectomy, osteophytectomy and decompression of spinal cord and/or nerve roots; cervical below C2                                               |
| 48140                                                                     | 167   | 0.9  | Pancreatectomy, distal subtotal, with or without splenectomy; without pancreaticojejunostomy                                                                                                                        |
| 58548                                                                     | 159   | 0.9  | Laparoscopy, surgical, with radical hysterectomy, with bilateral total pelvic lymphadenectomy and para-aortic lymph node sampling (biopsy), with removal of tube(s) and ovary(s), if performed                      |
| 44145                                                                     | 156   | 0.8  | Colectomy, partial; with coloproctostomy (low pelvic anastomosis)                                                                                                                                                   |

CPT=Current Procedural Terminology
